1 **The genetic population structure of Lake Tanganyika's *Lates***  
2 **species flock, an endemic radiation of pelagic top predators**

3

4 Jessica A. Rick<sup>\*1</sup>, Julian Junker<sup>\*2,3</sup>, Ismael A. Kimirei<sup>4</sup>, Emmanuel A. Sweke<sup>4,5</sup>, Julieth B.  
5 Mosille<sup>4</sup>, Christian Dinkel<sup>2</sup>, Salome Mwaiko<sup>2,3</sup>, Ole Seehausen<sup>2,3</sup>, Catherine E. Wagner<sup>1</sup>

6

7 \* denotes equal contribution

8

9 <sup>1</sup> Department of Botany and Program in Ecology, University of Wyoming, 1000 E University  
10 Dr., Laramie, Wyoming 82072 USA

11 <sup>2</sup> EAWAG Swiss Federal Institute of Aquatic Science and Technology, CH-6047  
12 Kastanienbaum, Switzerland

13 <sup>3</sup> Division of Aquatic Ecology & Evolution, Institute of Ecology & Evolution, University of Bern,  
14 CH-3012 Bern, Switzerland

15 <sup>4</sup> Tanzania Fisheries Research Institute (TAFIRI), Dar es Salaam, Tanzania

16 <sup>5</sup> Deep Sea Fishing Authority (DSFA), Zanzibar, Tanzania

17 Corresponding authors: Jessica Rick ([jrick@uwyo.edu](mailto:jrick@uwyo.edu)) and Catherine E. Wagner  
18 ([Catherine.Wagner@uwyo.edu](mailto:Catherine.Wagner@uwyo.edu))

19

20 **Running title:** Population genetics of *Lates* fishes

21

22 **Abstract**

23 Life history traits are important factors in shaping gene flow within species, and these traits  
24 can thus be determinants of whether a species exhibits genetic homogeneity across its  
25 range, or considerable population structure. Furthermore, understanding genetic connectivity  
26 plays crucially into species conservation decisions, and genetic connectivity is an important  
27 component of modern fisheries management in fishes exploited for human consumption. In  
28 this study, we investigated the four endemic *Lates* species of Lake Tanganyika (*Lates*  
29 *stappersii*, *L. microlepis*, *L. mariae* and *L. angustifrons*), sampled along the Tanzanian  
30 shoreline, using reduced-representation genomic sequencing methods. Based on previous  
31 studies, we predicted little genetic population structure in the entirely pelagic *L. stappersii*  
32 and the predominantly pelagic *L. microlepis*. In contrast, we expected the highest genetic  
33 differentiation in populations of *L. mariae*, which is the most resident and for which females  
34 aggregate over spawning grounds. We predicted that *L. angustifrons* would show  
35 intermediate structure. We indeed find the most strongly differentiated genetic clusters in *L.*  
36 *mariae*. However, contrary to our predictions, we find evidence for genetically distinct (albeit  
37 weakly differentiated) groups within the pelagic *L. stappersii* and *L. microlepis*, and no  
38 genetic structure in *L. angustifrons*. We call for management approaches accounting for  
39 genetically differentiated populations of *L. stappersii*, *L. microlepis*, and *L. mariae*, which are  
40 commercially important species in the region.

41

42 **Keywords:** endemic radiation, Lake Tanganyika, population structure, gene flow

43

## 44 **Introduction**

45 Intraspecific gene flow is shaped by an organism's life history traits (Ellegren & Galtier 2016).  
46 Life history traits, including reproduction, growth and dispersal, strongly influence the genetic  
47 structure of populations (Manier & Arnold 2006; Stearns 1992). Differences in life history  
48 traits also explain why ecologically similar taxa inhabiting the same environment may differ in  
49 their genetic population structure (Peterman *et al.* 2015; Young *et al.* 2015). Conversely,  
50 landscape features may lead to similar population structures even in species with different  
51 life history traits (e.g. Petren *et al.* 2005).

52 Aquatic ecosystems are often inhabited by fish species with major differences in life history  
53 traits sharing the same environment. In teleost fishes, life history traits—such as spawning  
54 location, philopatry, timing of spawning and duration of larval stage—have been shown to  
55 shape population structure (Olsen *et al.* 2011; Pettersson *et al.* 2019; Young *et al.* 2015).  
56 Anadromous salmonids are particularly notorious for displaying homing behaviour that leads  
57 to genetic distinction among spawning grounds, dividing populations into many genetic units  
58 despite the populations spending most of their lives together in the ocean (Wenburger *et al.*  
59 1998). Divergence between populations caused by differences in the timing of spawning also  
60 leads to genetic structure in salmonids (Brannon *et al.* 2004) and has also been observed in  
61 Atlantic herrings (Pettersson *et al.* 2019). In the oceans, coral reef fishes with reproduction  
62 tied to the substrate, exhibit parental care strategies, and lack planktonic larvae, generally  
63 have significantly greater population structure than pelagic spawners or substrate spawners  
64 with planktonic larvae (Riginos *et al.* 2014). Additionally, a shorter larval phase among  
65 pelagic spawners can lead to a more structured population, because this leads to a shorter  
66 larval dispersal distance (Selkoe & Toonen 2011). Understanding how life history traits like  
67 dispersal, reproduction, and growth, shape gene flow in fish species is crucial for the goal of  
68 improving our understanding of local adaptation, speciation, persistence of populations,  
69 migration, and the spatial scale of effective management (Sunday *et al.* 2014).

70 The use of next generation sequencing methods, which can resolve even fine-scale genetic  
71 structure through sampling a large proportion of the genome, is a useful tool to describe  
72 population structure, particularly in species with low genetic differentiation. The advent of  
73 these methods, and their application to understanding genetic structure, have made  
74 important contributions to understanding management units in exploited populations.  
75 Examples include the classification of spring and fall spawners in Atlantic herring (Martinez  
76 Barrio *et al.* 2016; Pettersson *et al.* 2019) and the differentiation between migrating and  
77 resident stocks of Atlantic cod (Kirubakaran *et al.* 2016).

78

79 *The pelagic fish community and the fishery of Lake Tanganyika*

80 The pelagic fish community of Lake Tanganyika is relatively low in species diversity  
81 compared to that of other large African lakes: it consists predominantly of six endemic fish  
82 species belonging to two families (Coulter 1991). These include a monophyletic pair of  
83 mainly planktivorous clupeids (*Stolothrissa tanganyicae*, *Limnothrissa miodon*; Junker *et al.*  
84 2020; Wilson *et al.* 2008) and four mainly piscivorous latids of the genus *Lates* (*L. stappersii*,  
85 *L. mariae*, *L. microlepis*, *L. angustifrons*). Cichlid fish, so diverse and abundant in the pelagic  
86 communities of other African Great Lakes, are rare in the pelagic zone of Lake Tanganyika.  
87 Of the four *Lates* species, only *L. stappersii* is sufficiently abundant to be critical for the  
88 current fishery of Lake Tanganyika, the second largest inland fishery on the continent of  
89 Africa (Coulter 1976, 1991; Kimirei *et al.* 2008; Mannini 1998a, b; Mölsä *et al.* 1999; Mölsä *et al.*  
90 2002; Munyandero 2002; Sarvala *et al.* 2002; van der Knaap 2013; Van der Knaap *et al.*  
91 2014; van Zwieten *et al.* 2002). Populations of *L. mariae*, *L. microlepis* and *L. angustifrons*  
92 suffered major population declines during the 1960s when an industrial purse seine fishery  
93 supplemented the traditional fishery (Coulter 1976, 1991; Mölsä *et al.* 2002). The industrial  
94 fishery was outcompeted by the artisanal fishery as fishermen transitioned to using powerful  
95 outboard engines on their traditional wooden fishing boats, allowing boats to fish further  
96 offshore (Kimirei *et al.* 2008). The last industrial fishing vessel stopped operating in 2011  
97 (LTA Secretariat 2011; Paffen *et al.* 1997; Van der Knaap *et al.* 2014), but the populations of  
98 *L. microlepis*, *L. mariae* and *L. angustifrons* have remained low ever since. The very large  
99 size and slow time to maturation of these species makes them particularly vulnerable to  
100 fishing pressures and all three are listed by the IUCN as vulnerable (*L. mariae*) or threatened  
101 (*L. microlepis* and *L. angustifrons*) (Ntakimazi 2006a, b, c).

102 During the last decades, a general downward trend in fish catches was observed for Lake  
103 Tanganyika's fishery (Kimirei *et al.* 2008; van der Knaap 2013; Van der Knaap *et al.* 2014;  
104 van Zwieten *et al.* 2002). This trend results from a combination of an increase in the number  
105 of fishermen and vessels on Lake Tanganyika, changes in fishing practices (e.g. the use of  
106 beach seining, which targets fish in their in-shore nursery habitats) (Kimirei *et al.* 2008; van  
107 der Knaap 2013; Van der Knaap *et al.* 2014; van Zwieten *et al.* 2002), and warming lake  
108 surface temperatures (Cohen *et al.* 2016; O'Reilly *et al.* 2003). Although the practice of  
109 beach seining is illegal according to the fishing regulations of the Lake Tanganyika Authority  
110 (LTA Secretariat 2011), it still occurs due to difficulties associated with enforcing the  
111 regulation across the four riparian countries. Decreases in fish abundance are likely also  
112 linked to reduced productivity in the lake caused by stronger water column stratification due  
113 to climate change (O'Reilly *et al.* 2003; Verburg *et al.* 2003). Consequently, there is  
114 increasing recognition of the need to develop sustainable management strategies for the  
115 lake's pelagic fish stocks (Kimirei *et al.* 2008; Mölsä *et al.* 1999; Mölsä *et al.* 2002; van der

116 Knaap 2013; Van der Knaap *et al.* 2014; van Zwieten *et al.* 2002). Sustainable management  
117 of the fishery and safeguarding the survival of the more vulnerable species (i.e. the three  
118 large *Lates* species, *L. mariae*, *L. angustifrons* and *L. microlepis*) requires complete  
119 information on the factors influencing the health of these stocks. This includes an  
120 understanding of the stock complexity and the impacts of differences in life history and  
121 environment on population structure of these species. This study focuses on adding this  
122 additional important information to our understanding of the four *Lates* species in Lake  
123 Tanganyika.

124 The fish populations of Lake Tanganyika are influenced by a complex interplay of bottom-up  
125 control via changes in the supply of nutrient-rich deep waters, driven by different mixing  
126 regimes and upwelling rates (Bergamino *et al.* 2010; O'Reilly *et al.* 2003; Stenuite *et al.* 2007;  
127 Verburg & Hecky 2009; Verburg *et al.* 2003), and a top-down control via predators and  
128 fishing (Kimirei *et al.* 2008; Mannini 1998a; Mannini *et al.* 1996; Munyandero 2002; van der  
129 Knaap 2013; Van der Knaap *et al.* 2014; van Zwieten *et al.* 2002). If environmental  
130 differences, such as mixing regimes and nutrient supply, are consistent over generations and  
131 coupled with limited gene flow between spatially segregated populations, divergent selection  
132 on life history traits (e.g. spawning phenology, developmental timing and recruitment  
133 success) of species in different parts of the lake could develop and persist. The spatial  
134 environmental variation of Lake Tanganyika, in combination with the large distances between  
135 populations, might therefore generate intraspecific genetic differentiation among populations  
136 of pelagic fish, as has been shown for pelagic cichlids in Lake Tanganyika and Lake Malawi  
137 (Genner *et al.* 2010; Koblmüller *et al.* 2019). Here, we test these predictions using genomic  
138 data collected from each of the four *Lates* species from across their distribution within Lake  
139 Tanganyika.

140

#### 141 *The biology of the four Lates species*

142 Relatively little is known about the location of spawning grounds of all four *Lates* species.  
143 Coulter (1976) mentions that ripe-running females of *L. angustifrons* and *L. mariae* are  
144 occasionally caught in benthic gill nets and the *L. mariae* females were aggregated,  
145 suggesting that spawning females concentrate over benthic spawning grounds. Eggs and  
146 freshly hatched larvae of all species are likely planktonic given other data from this genus  
147 (van Zwieten *et al.* 2016). Juveniles of all four species up to a size of 2.5cm are caught in  
148 plankton nets (Coulter 1976). The smallest species, *L. stappersii*, is the only species of the  
149 four endemic *Lates* that spends its entire life in the pelagic, whereas juveniles (>3cm) and  
150 adolescents of the three larger species are found in shared inshore nursery habitats,  
151 predominantly in the macrophyte *Ceratophyllum* (Coulter 1976; Kondo and Abe 1995).

152 Pelagic nursery habitats for *L. stappersii* have been recorded near Kigoma in the northern  
153 basin (Mannini et al. 1996), and in the central basin (Chapman and van Well 1978). Juvenile  
154 *L. stappersii* feed on zooplankton and switch to a more piscivorous diet when they reach a  
155 size of more than 130mm (Ellis 1978). The juveniles of *L. microlepis*, *L. mariae*, and *L.*  
156 *angustifrons* in the weed beds feed on zooplankton, prawns, cichlid fishes, insects, and  
157 insect larvae, and no difference between the three species' diets have been discerned  
158 (Coulter 1976). Once these species leave the inshore environment as they mature, they  
159 begin to differentiate in habitat and diet affinities. From the weed patches, *L. mariae* move to  
160 deeper water with increasing size, adopting a benthic lifestyle, with benthic cichlids as their  
161 dominant prey (Coulter 1991). *L. microlepis* is the top predator in pelagic surface waters,  
162 feeding mainly on clupeids and on *L. stappersii* up to lengths of 40% of the predator's body  
163 length (Coulter 1976, 1991). Large *L. angustifrons* can be found throughout the water  
164 column. Based on diet composition, adult *L. angustifrons* predominantly hunt in inshore rocky  
165 habitats, feeding mainly on littoral cichlids (Coulter 1976, 1991). If clupeids are abundant,  
166 mature individuals of all three large species, *L. mariae*, *L. microlepis* and *L. angustifrons*, are  
167 found preying upon them during the night (Coulter 1976). Spawning individuals of all three of  
168 the large *Lates* species (*L. microlepis*, *L. mariae* and *L. angustifrons*) exist throughout the  
169 year but spawning peaks were reported for the southern end of the lake from August to  
170 December (Coulter 1976).

171 Evidence for intraspecific differences in ecology and life history traits are also found in *L.*  
172 *stappersii* and *L. mariae*. Mannini *et al.* (1999) found that *L. stappersii* in the northern basin  
173 have a diverse diet, dominated by clupeids, while *L. stappersii* in the southern basin mainly  
174 fed on atyid and palaemonid shrimps. Furthermore, the recruitment periods differ between  
175 regions of the lake and fish mature at larger sizes in the north than the south (Mannini et al.  
176 1996). Population sizes of *L. stappersii* are also heterogeneous along the length of Lake  
177 Tanganyika, with fish occurring in greater abundance in the north of the lake than the south.  
178 In contrast, catch rates of *L. mariae* and *L. microlepis* increase from north to south, with the  
179 most abundant populations being found in the southern portion of the lake.

180

### 181 *The need for a population genetic study*

182 For conservation and fisheries management, which seeks to avoid depletion of fish stocks  
183 and to ensure sustainable harvest (Reiss *et al.* 2009), understanding the genetic population  
184 structure of species is essential. Disregarding population structure and managing a  
185 population complex as one population can lead to overfishing or even extinction of the more  
186 vulnerable populations (Reiss *et al.* 2009; Sterner 2007), and to loss of genetic diversity in  
187 the species as a whole. Reduced genetic variation that comes with decreased abundance

188 decreases the ability of a species to adapt and evolve in response to changes in its  
189 environment (Mace & Purvis 2008). Defining Management Units (MUs)—demographically  
190 independent and genetically distinct populations—in pelagic mixed stocks is therefore key to  
191 understanding populations' resilience to fishing pressure (Belgrano & Fowler 2011; Berg *et al.*  
192 *et al.* 2017; Botsford *et al.* 1997; Hutchinson 2008; Kirubakaran *et al.* 2016).

193 The pelagic zone of the two large lakes in the western arm of the East African rift valley  
194 comprises such mixed stocks. In Lake Malawi the pelagic is inhabited by 21 of the 800  
195 different cichlid species present in this lake, nearly all of them endemic (Malinsky *et al.* 2018;  
196 Snoeks & Carvalho 2004). Among them is the benthopelagic taxon *Diplotaxodon*, which  
197 comprises eight species (Snoeks & Carvalho 2004). Genner *et al.* (2010) sampled individuals  
198 on spawning grounds and found genetic structure among spawning grounds within four of  
199 the species. They suggest that strong spawning site fidelity explains this genetic structure.  
200 Besides the most abundant species (clupeids and *Lates*) in Lake Tanganyika's pelagic, there  
201 is the endemic cichlid tribe Bathybatini, including nine species (seven *Bathybates* and two  
202 *Hemibates*), which all inhabit the eu- or benthopelagic habitat (Coulter 1991; Koblmüller *et al.*  
203 2019). All nine species are mouthbrooders, all species exceed 30cm (except for *B. minor*),  
204 and all are predatory. In a study where four of these species were tested for intraspecific  
205 genetic structure, Koblmüller *et al.* (2019) found no genetic structure in the two species  
206 inhabiting the eupelagic, *Bathybates fasciatus* and *B. leo*, but clear differences in the two  
207 benthopelagic species, *B. graueri* and *Hemibates stenosoma*. These two species showed  
208 genetic distinction between populations in the north and south of the lake. Koblmüller *et al.*  
209 (2019) hypothesize that the specialization on different types of prey might explain these  
210 differences in population structure. While *B. fasciatus* and *B. leo* mainly hunt pelagic clupeids  
211 (and therefore perform long distance movements in the open water), *B. graueri* and *H.*  
212 *stenosoma* hunt benthic and benthopelagic cichlids and therefore do not need to move long  
213 distances through open water to find their prey. Koblmüller *et al.* (2019) hypothesize that  
214 such foraging behavior might translate into different rates of dispersal.

215 Compared to the *Lates* of Lake Tanganyika, these cichlids have dramatically different life  
216 histories such as mouth brooding, much larger larvae that are fully developed miniature  
217 versions of their parents when released from their mother's mouth, and no pelagic juvenile  
218 phase. However, similar to the cichlid genus *Bathybates*, the *Lates* species flock is  
219 comprised of two species with closer ties to the littoral (*L. angustifrons*) and the benthopelagic  
220 (*L. mariae*) and two species more associated with the eupelagic (*L. stappersii* and *L.*  
221 *microlepis*). Given these differences in life history among the four *Lates* species, it is  
222 possible that the genetic consequences of their shared spatial environment differ between  
223 species. For example, due to *L. stappersii* having an entirely pelagic lifestyle, including  
224 spawning, we hypothesize that its population is more panmictic than those of the other

225 species, which have aggregated spawning grounds (*L. mariae*) and inshore nursery habitats  
226 (*L. angustifrons*, *L. microlepis*, *L. mariae*).

227 Analyzing and understanding the possibly differential responses of genetically differentiated  
228 stocks to exploitation and environmental variation is of great importance for developing  
229 successful conservation and fisheries management strategies (Hutchinson 2008; Therkildsen  
230 *et al.* 2013). Stock diversity can contribute to the resilience of a fishery to environmental  
231 fluctuations (Schindler *et al.* 2015) and the loss of differentiated populations can compound  
232 to major losses in the consistency of fisheries yields (Hutchinson 2008; Schindler *et al.*  
233 2010). It is therefore crucial to understand the extent and nature of population genetic  
234 structure and differential adaptation in fishes that are important food and economic  
235 resources. The loss of population diversity may have drastic effects on ecosystem services  
236 and species persistence, and understanding the extent to which population structure exists is  
237 crucial for predicting these consequences (Schindler *et al.* 2015; Schindler *et al.* 2010).

238 Here, we used reduced-representation genomic sequencing datasets from four endemic  
239 *Lates* species, *L. stappersii*, *L. mariae*, *L. microlepis*, and *L. angustifrons*, sampled  
240 throughout the Tanzanian waters of Lake Tanganyika to examine their genetic connectivity.  
241 Because this is the first population genetic work including all four Tanganyikan species (see  
242 Koblmüller *et al.* 2021 for a phylogenetic assessment of African *Lates*), we first assessed  
243 whether phenotypic identification coincides with genetically based species boundaries. We  
244 then examined the extent to which each of the four species is genetically structured, as well  
245 as how the genetic structure observed in each species corresponds to its known life history  
246 and environment. Based on the literature, we hypothesized to find little genetic population  
247 structure in the entirely pelagic *L. stappersii* and mainly pelagic *L. microlepis* (Coulter 1976).  
248 In contrast, we expected the highest genetic differentiation in populations of *L. mariae*.  
249 Finally, we hypothesized that *L. angustifrons* would show intermediate amounts of structure  
250 since there is no evidence for large scale movements of this species (Coulter 1976). Despite  
251 absence of isolation-by-distance in any of the four species, we find evidence for strongly  
252 differentiated geographically linked genetic clusters in *L. mariae*, as well as less strongly  
253 differentiated genetic groups within *L. stappersii* and *L. microlepis*, while we find no distinct  
254 genetic clusters in *L. angustifrons*.

## 255 **Material and Methods**

### 256 *Study system and sampling*

257 Between 2001 and 2019, we collected tissue samples (fin clips) from *L. stappersii*, *L. mariae*,  
258 *L. microlepis*, and *L. angustifrons* at 9 general locations along the Tanzanian shore of Lake  
259 Tanganyika, which together span the ~490 km shoreline from the northern to southern border



260 (Fig 1). Most fish were obtained opportunistically from fishermen, and therefore were already  
261 dead when we received them. All fish collections were made in partnership with researchers  
262 of the Tanzanian Fisheries Research Institute (TAFIRI) in Kigoma, Tanzania. Fish were  
263 identified in the field by sampling personnel following United Nations Food and Agricultural  
264 Organization (FAO) identification guidelines (Eccles 1992) and guidance from Tanzanian  
265 researchers and local fishermen, and genetic methods were later used to confirm species  
266 identities for each fish. For fish collected from 2016-2019, we recorded length and weight,  
267 and took standardized pictures of each fish. For the few live fish that were caught as part of  
268 other research, we took cuvette photographs of the live fish and subsequently euthanized the  
269 fish with an overdose of MS222. We then took fin clips for genetic analysis and muscle tissue  
270 samples for stable isotope analysis from all fish. Specimens smaller than 600mm were  
271 preserved in formaldehyde and archived in the collections at TAFIRI (Kigoma, Tanzania),  
272 EAWAG (Kastanienbaum, Switzerland), the University of Wyoming Museum of Vertebrates  
273 (Laramie, WY, USA), or the Cornell University Museum of Vertebrates (Ithaca, NY, USA).

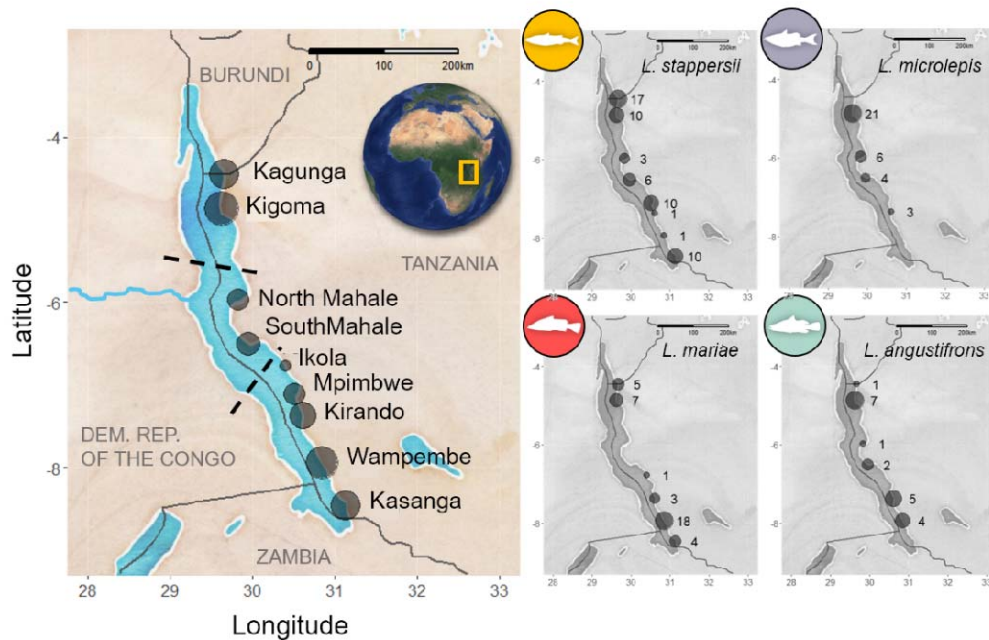

274

275 **Figure 1.** Sampling site locations (left) and number of individuals retained in the final filtered datasets  
276 at each site for each of the four Lake Tanganyika-endemic *Lates* species (right). In all maps, circle  
277 sizes are proportional to the number of samples in the final dataset.

278

### 279 *Genomic sequencing*

280 We extracted DNA from fin clips using DNeasy Blood and Tissue Kits (Qiagen, Inc.) following  
281 the standard protocol, with the addition of an RNase A preparation step. We then prepared

282 genomic libraries for a combination of genotyping-by-sequencing (GBS, for *L. stappersii*, *L.*  
283 *mariae*, *L. microlepis*, *L. angustifrons*) and restriction site associated DNA sequencing (RAD,  
284 for *L. stappersii*).

285 We prepared GBS libraries following protocols outlined in Parchman *et al.* (2012), using MseI  
286 and EcoRI restriction enzymes. Following fragmentation via restriction enzyme digestion,  
287 fragmented DNA was barcoded by ligating short, unique individual-identifying DNA fragments  
288 (barcodes) to each individual's fragmented DNA. These barcoded fragments were then  
289 amplified by PCR and pooled for sequencing. We ran two replicate PCRs for each individual  
290 and pooled the final PCR products into two libraries. The prepared libraries were size-  
291 selected for 200-350bp fragments using Blue Pippin (Sage Science, MA). One library was  
292 sequenced on one lane of Illumina HiSeq4000 (150bp single-end) at the University of Texas  
293 at Austin's Genome Sequencing and Analysis Facility (UT GSAF; Austin, TX) and the other  
294 library was sequenced on one lane of Illumina HiSeq4000 (150bp, single-end) at the  
295 University of Oregon's Genomics and Cell Characterization Core Facility (Eugene, OR). Each  
296 library contained 192 individuals, and select individuals were duplicated across libraries to  
297 check for library compatibility.

298 The RAD libraries containing the *L. stappersii* were prepared for sequencing following the  
299 protocol by Baird *et al.* (2008) with the following modifications: we used between 400ng and  
300 1000ng genomic DNA per sample and digested with *SbfI* overnight. We tagged each  
301 individual using P1 adapters (synthesized by Microsynth) with custom six to eight base pair  
302 barcodes and multiplexed 67 barcoded individuals per library. The libraries were sheared  
303 using an S220 series Adaptive Focused Acoustic (AFA) ultra-sonicator (Covaris) with the  
304 manufacturer's settings for a 400 bp mean fragment size. We size-selected for fragments  
305 between 300 and 700bp using a sageElf (Sage Scientific Electrophoretic Lateral  
306 Fractionator; Sage Science, Beverly, MA). The enrichment step was done in 6 aliquots with a  
307 total volume of 200  $\mu$ l. Volumes were combined prior to the final size selection (again 300-  
308 700bp) step using the sageELF. Sequencing was done by the Lausanne Genomic  
309 Technologies sequencing facilities (University of Lausanne, Switzerland). All three libraries  
310 were single-end sequenced on one lane each of the Illumina HiSeq2000 (100bp SE), along  
311 with spiked-in bacteriophage PhiX genomic DNA (7-8%).

312

### 313 *Sequence data preparation*

314 We filtered raw sequencing reads from each library by first removing the reads of the PhiX  
315 genome and other common contaminants (e.g. excess barcodes, primers, and adapters)

316 using bowtie2 (v2.0.0, Langmead & Salzberg 2012). We filtered reads for an intact enzyme  
317 restriction site (*SbfI* for RAD libraries, *MseI* and *EcoRI* for GBS libraries), de-multiplexed the  
318 fastq files, and matched sequence barcodes to individual fish using custom perl and bash  
319 scripts.

320 For the GBS libraries, all data were assembled to the chromosome-level *Lates calcarifer*  
321 reference genome (v3, NCBI Genome Assembly GCA\_001640805.1; Vij *et al.* 2016) using  
322 bwa mem (v0.7.17; Li & Durbin 2009) with default settings. Following alignment, we excluded  
323 any individual with < 50,000 reads or less than 60% of raw reads assembled to the reference  
324 genome. We identified variable sites (i.e. single nucleotide polymorphisms; SNPs) in the  
325 assembly using SAMtools mpileup (v1.8; Li *et al.* 2009) and bcftools (v1.8; Li *et al.* 2009). In  
326 calling variable sites, we omitted indels and kept only high-quality biallelic variant sites  
327 (QUAL < 20 and GQ > 9). We then filtered SNPs by minor allele frequency and amount of  
328 missing data using vcftools (Danecek *et al.* 2011), additionally only calling genotypes with a  
329 minimum read depth of 2. We created two separate SNP data sets, using a minor allele  
330 frequency threshold of 0.01 for both and keeping only sites that were present in 50% (for the  
331 first dataset, used for population genetic analyses) or 90% of individuals (for the second  
332 dataset, used in phylogenetic analyses). Finally, we thinned each data set to retain one SNP  
333 per locus (-thin 90).

334 For the RAD libraries, we barcode-trimmed reads down to 84 nucleotides using  
335 process\_radtags from Stacks (Catchen *et al.* 2013). The FASTX-toolkit v.0.0.13  
336 ([http://hannonlab.cshl.edu/fastx\\_toolkit/](http://hannonlab.cshl.edu/fastx_toolkit/)) was used for quality filtering. In a first step, we kept  
337 only reads with all base quality scores greater than 10; in a second step, we removed all  
338 reads with more than 5% of the bases with quality score below 30. The RAD library was then  
339 assembled to the *Lates calcarifer* reference genome (Vij *et al.* 2016) and filtered, following  
340 the same steps as for the GBS libraries above. Individuals included in the RAD libraries were  
341 distinct from those included in the GBS libraries.

342 After filtering variants, we calculated the distribution of minor allele reads at heterozygous  
343 sites for each individual in both RAD and GBS libraries, using a custom bash script (available  
344 at <http://github.com/jessicarick/lates-popgen>). If there is an excess of sequencing errors or  
345 contamination for an individual, then we would expect the ratio of minor allele to major allele  
346 reads to be significantly less than 1:1. Thus, we plotted the distribution of minor allele reads  
347 for each individual and removed individuals with a deficiency in minor allele reads across the  
348 majority of heterozygous sites from further analyses.

349

## 350 *Species assignment*

351 Not all of our samples could be identified to species in the field. Some fish were caught deep  
352 and brought quickly to the surface by the fishermen. These fish were often difficult to identify,  
353 since their morphology was impaired due to the rapid change in pressure. Furthermore,  
354 juveniles of the large species *L. microlepis*, *L. mariae* and *L. angustifrons* can be difficult to  
355 distinguish. Because this is the first genetic study of the four Lake Tanganyika *Lates* species,  
356 we used three different lines of evidence to confirm species identification and ensure that  
357 morphological identification matched genetic assignment: (1) phenotypic identification based  
358 on FAO species descriptions; (2) individual ancestry assignment using model-based  
359 assignment; and (3) inference of monophyletic groups in phylogenetic analysis. The details  
360 for each of these steps are described below.

361 With the GBS data, we moved forward with the SNP dataset filtered for < 50% missing data  
362 and minor allele frequency above 0.01. We first visualized clusters in our data using principal  
363 component analysis (prcomp in R) on genotype covariance matrices calculated from the SNP  
364 data. We then inferred species groups using the model-based genetic clustering program  
365 entropy (Gompert *et al.* 2014). Entropy estimates individual ancestry from multilocus SNP  
366 data, using Bayesian estimation from genotype likelihoods. In taking uncertainty about  
367 individual genotypes into account via genotype likelihoods, the model integrates outcomes  
368 over genotype uncertainty. We converted our VCF containing sites with <50% missing data  
369 to the mpgl genotype likelihood format using the custom vcf2mpgl.pl script. We then ran  
370 entropy for K = 4 clusters, running three independent MCMC chains of 80,000 total steps,  
371 discarding the first 10,000 steps as burn-in, and retaining every 10<sup>th</sup> value (thin=10), resulting  
372 in 7000 samples from the posterior distribution of each chain. We checked MCMC chains for  
373 mixing and convergence of parameter estimates by plotting a trace of the MCMC steps. We  
374 then visualized assignments in R and assigned individuals to species based on group  
375 assignment probabilities (q), using a threshold of 0.6 for assignment.

376 We further confirmed species identities using maximum likelihood phylogenetic inference  
377 methods in RAxML (v8.1.17; Stamatakis 2014). We concatenated all SNPs within our <10%  
378 missing data dataset, removed invariant sites using the raxml\_ascbias python script (v1.0,  
379 from [https://github.com/btmartin721/raxml\\_ascbias](https://github.com/btmartin721/raxml_ascbias)), and used the Lewis correction for  
380 invariant sites with the ASC\_GTRGAMMA model of molecular evolution (Lewis 2001) within  
381 RAxML to construct the maximum likelihood phylogeny, including *L. calcarifer* as the  
382 outgroup. We used 100 rapid bootstraps to estimate confidence in our maximum likelihood  
383 tree. We visually identified monophyletic groups on our maximum likelihood tree to delineate  
384 species and used these groupings to further verify species identities from entropy.

385

### 386 *Genetic diversity*

387 We calculated genetic diversity for each species using the aligned BAM files in ANGSD  
388 (v0.931, Korneliussen *et al.* 2014). From BAM alignment files, we first calculated the site  
389 allele frequency likelihoods based on individual genotype likelihoods (option -doSaf 1) using  
390 the samtools model (option -GL 1), with major and minor alleles inferred from genotype  
391 likelihoods (option -doMajorMinor 1) and allele frequencies estimated according to the major  
392 allele (option -doMaf 2). We filtered sites for a minimum read depth of 2 and a maximum  
393 depth of 100, minimum mapping quality of 20 and minimum quality ( $q$ -score) of 20. From the  
394 site allele frequency spectrum, we then calculated the maximum-likelihood estimate of the  
395 folded site frequency spectrum (SFS) using the ANGSD realSFS program (with option -fold  
396 1). The folded SFS was used to calculate genome-wide genetic diversity (Watterson's  $\Theta$ ),  
397 using the ANGSD thetaStat program (Korneliussen *et al.* 2013).

398

### 399 *Population genetic structure and isolation-by-distance*

400 For each species, we then re-called variants to create a species-specific set of SNPs from  
401 the GBS data. As with the species combined GBS data set, we identified variable sites in  
402 each species' assembly using SAMtools mpileup and bcftools, omitting indels and keeping  
403 only high-quality biallelic variant sites (QUAL < 20 and GQ > 9). We then filtered SNPs by  
404 minor allele frequency (threshold 0.01) and amount of missing data (50% threshold) using  
405 vcftools (Danecek *et al.* 2011), additionally only calling genotypes with a minimum read depth  
406 of 2. Finally, we thinned to one SNP per locus (-thin 90).

407 For each species, we then performed principal component analysis (PCA) using EMU  
408 (Meisner *et al.* 2021) to visualize the genetic affinities of individuals within each species.  
409 EMU uses an iterative method to infer population structure in the presence of missing data  
410 and is therefore able to infer population structure even for datasets of ultra-low coverage  
411 sequencing data with very high missingness rates, in addition to being able to handle non-  
412 random missingness patterns, which tend to produce bias in other PCA methods (Meisner *et al.*  
413 *et al.* 2021). We also performed PCA in EMU on the RAD dataset for *L. stappersii*, as a  
414 comparison for our GBS dataset.

415 We then used the Reich-Patterson  $F_{ST}$  estimator (Reich *et al.* 2009), which is consistent even  
416 with small sample sizes, to calculate genetic divergence between sampling sites within each  
417 species, using a custom function in R (available at <http://github.com/jessicarick/reich-fst>). We

418 then tested for isolation-by-distance (IBD) using a Mantel test (mantel.randtest from ade4 in  
419 R; v1.7-16, Dray & Dufour 2007) to calculate the correlation between the natural logarithm of  
420 Euclidean geographic distance and genetic distance ( $1/1-F_{ST}$ ) for all pairwise combinations of  
421 sampling sites within each species. We chose to pool these tests by sampling site, as we do  
422 not have more specific locations for where most of the fish were caught.

423 To test for intraspecific population subdivision more formally, we again used entropy. We  
424 conducted clustering analyses using the dataset with < 50% missing data per site and minor  
425 allele frequency > 0.01. We ran entropy for K=1 to K=8 for each species to infer the most  
426 likely number of ancestral groups within each species, and to assign individuals to these  
427 clusters. We ran three independent MCMC chains of 80,000 total steps, discarding the first  
428 10,000 steps as burn-in, and retaining every 10<sup>th</sup> value (thin=10), resulting in 7000 samples  
429 from the posterior distribution of each chain. We checked MCMC chains for mixing and  
430 convergence of parameter estimates by plotting a trace of the MCMC steps. We then  
431 calculated the deviance information criterion (DIC) for each value of K and used the model  
432 with the lowest DIC as our best for modeling the variation observed in our data. From our  
433 entropy results, we assigned individuals to intraspecific groups using a cutoff of  $q > 0.6$  at  
434 each value of K. We then calculated the mean of Reich-Patterson  $F_{ST}$  estimates between  
435 these K groups in R to understand how genetically distinct these groups are from one  
436 another.

437

## 438 **Results**

439 The GBS libraries yielded an average of 245 million reads across 200 individuals. The RAD  
440 libraries containing the *L. stappersii* individuals yielded an average of 271 million reads  
441 across 58 individuals, including 2.5% - 8.6% bacteriophage PhiX genomic DNA. On average,  
442 the mapping rate for *L. stappersii* individuals' GBS reads to the *L. calcalifer* reference  
443 genome was 89.8% (RAD, 89.6%), whereas it was 91.6% for *L. microlepis*, 91.3% for *L.*  
444 *mariae* and 88.7% for *L. angustifrons* individuals.

445 These mapping rates resulted in 1,463,702 unfiltered variable sites in *L. stappersii*,  
446 1,286,810 in *L. microlepis*, 961,153 in *L. mariae* and 764,456 in *L. angustifrons*. After filtering  
447 for < 50% missing data, minor allele frequency (MAF > 0.01), and keeping only one SNP per  
448 locus (-thin 90), our species-specific GBS data sets contained 54,193 SNPs from 58 *L.*  
449 *stappersii* individuals (RAD, 34,044 SNPs from 58 different individuals), 40,887 SNPs from  
450 34 *L. microlepis* samples, 43,143 SNPs from 38 *L. mariae* samples and 25,322 SNPs from

451 20 *L. angustifrons* samples. The data set with all four species contained 4,999,192 unfiltered  
452 and 61,094 filtered SNPs.

453

#### 454 *Species assignment*

455 The species-combined SNP dataset for GBS data contained 200 individuals, of which we  
456 removed 50 individuals due to bad read quality or for having highly unbalanced reads at  
457 heterozygous sites, potentially indicative of PCR duplicates and contamination. The  
458 remaining individuals had > 50,000 reads that aligned to the *L. calcarifer* reference genome  
459 and > 80% of genotypes called. The SNP alignment for RAxML contained 38,737 sites after  
460 filtering for < 10% missing data, a minimum read depth of 5, and removing invariant sites.  
461 The rooted maximum likelihood phylogeny (rooted on *L. calcarifer*; Fig. 2A) shows a sister  
462 taxon relationship between *L. mariae* and *L. angustifrons*, and a sister taxon relationship  
463 between *L. stappersii* and *L. microlepis* (conflicting with the best supported topology in  
464 Koblmüller *et al.* 2021); however, short internode distances between these splits suggests  
465 that all three speciation events may have occurred within a short period, and more  
466 investigation of the divergence history of the clade is warranted but not the focus of this  
467 current work. The PCA based on the GBS data was consistent with the species affinities  
468 indicated by monophyletic groups in RAxML (Fig. 2B). The first genetic PC axis (79.9%)  
469 separates *L. stappersii* from the remaining three species. The second PC axis (14.8%) then  
470 separates *L. mariae* and *L. microlepis* from one another, and the third axis (4.8%) separates  
471 *L. angustifrons* from the other three species. Using entropy at K=4, we found each of the four  
472 species to make a distinct genetic cluster (Fig. 2C). Based on these combined analyses, 58  
473 individuals were assigned to *L. stappersii*, 34 to *L. microlepis*, 38 to *L. mariae*, and 20 to *L.*  
474 *angustifrons*. While the genetic approaches revealed consistent species identifications, we  
475 had phenotypically misidentified one *L. microlepis*, one *L. mariae* and three *L. angustifrons*  
476 (Table S1).

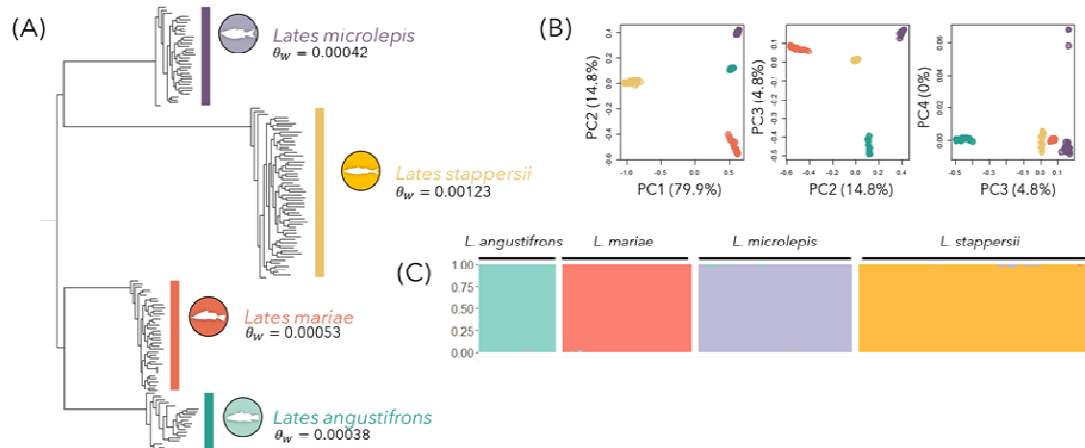

477

478 **Figure 2.** Relationships among the four endemic *Lates* species in Lake Tanganyika based on the GBS  
479 data set, as demonstrated by their (a) phylogenetic relationships, (b) relationships using principal  
480 component analysis, (c) genetic clustering using entropy at K=4. The phylogeny has been rooted  
481 using *L. calcarifer* as an outgroup. In (a), genetic diversity of the given species, as measured using  
482 Watterson's  $\Theta$  in ANGSD, is indicated. Percentages in (b) indicate that amount of variance explained  
483 by the given principal component axis (axes 1-4 shown). In (c) each vertical bar represents an  
484 individual, and the colors represent the proportion of ancestry assigned to each of the four species.

485

#### 486 *Population structure*

487 All four species had low but similar levels of genetic diversity (mean  $\Theta_W = 0.00043$ ), and  
488 genetic diversity was slightly elevated in *L. stappersii* compared to the three other species  
489 (Fig 2A). Reflecting the distinctiveness seen in the PCA,  $F_{ST}$  values are high between  
490 species (mean Reich-Patterson  $F_{ST} = 0.607$ ; Table S2). None of the four species shows a  
491 significant relationship between genetic and geographic distance, suggesting an overall lack  
492 of isolation by distance (Fig S1 all Mantel test p-values > 0.2).

493 The PCA for *L. stappersii* based on GBS data (Fig 3A) did not reveal any clear genetic  
494 clusters, but most individuals from the sampling sites Kigoma, North Mahale and South  
495 Mahale do appear genetically distinct. We did not see any clustering in the RAD data for *L.*  
496 *stappersii* (Fig S2); however sampling from Kigoma was minimal (n=2) and North and South  
497 Mahale were not sampled at all in this dataset. The lack of structure among the locations that  
498 were sampled was, hence, consistent with the GBS data. In entropy, K = 1 was the best fit  
499 according to DIC (Fig 4A); however, at K = 2, individuals from Kigoma, North Mahale and  
500 South Mahale form a distinct genetic cluster (except for one fish from South Mahale). This  
501 weak but distinct genetic structure (between-cluster Reich-Patterson  $F_{ST} = 0.00168$ , 95%  
502 bootstrap CI: 0.00118-0.00216, Fig 4A and Table S3) was also partly reflected in  $F_{ST}$  values



503 between sampling sites, where  $F_{ST}$  values of comparisons between individuals of South  
504 Mahale or North Mahale with samples from other sites were elevated, albeit small ( $<0.007$ ,  
505 Fig S3A and S4A).

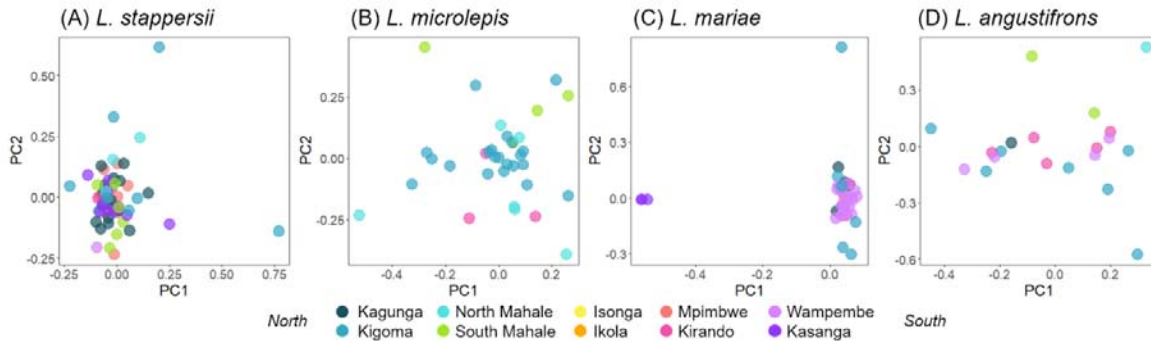

506

507 **Figure 3.** Principal component analysis of individual species based on the GBS data set, with colors  
508 indicating sampling locations. For each species, the plot shows the location of each individual on the  
509 two most dominant PCA axes

510

511 A similar pattern to that observed in *L. stappersii* was apparent in *L. microlepis*. The PCA  
512 based on GBS data did not reveal clear genetic clustering but it did highlight several  
513 individuals from the sampling sites North Mahale and South Mahale that were differentiated  
514 from samples of Kigoma and Kirando (Fig 3B). In entropy,  $K = 1$  was again found to be the  
515 best fit using DIC (Fig 4B) but at  $K = 2$  all six samples from North Mahale and one individual  
516 out of 4 from South Mahale form a distinct genetic cluster (Reich-Patterson  $F_{ST}$  between  
517 entropy-identified groups = 0.00257, 95% CI 0.00151-0.00393, Fig 4B and Table S3). The  
518  $F_{ST}$  estimates between samples from different sites are again very small (Fig S4B), but  
519 pairwise comparisons involving North Mahale samples differ significantly from zero (Fig  
520 S3B).

521 The PCA based on GBS data for *L. mariae* separates three individuals from Kasanga on the  
522 first PC axis, while the second PC axis separates out some individuals from Kigoma (Fig 3C).  
523 In entropy,  $K = 2$  appears to be the best fit using DIC, where the three individuals from  
524 Kasanga form a distinct cluster (Reich-Patterson  $F_{ST}$  between entropy-identified groups =  
525 0.132, 95% bootstrap CI: 0.128-0.138; Fig 4C and Table S3). At  $K = 3$ , five of our seven  
526 samples from Kigoma form the third, less distinct genetic cluster (mean Reich-Patterson  $F_{ST}$   
527 between entropy-identified groups = 0.0892, Fig 4C). The  $F_{ST}$  estimates between Kasanga  
528 (fish from both clusters pooled) and other sites are all significantly different from zero (Fig  
529 S3C). Additionally, the samples from Kigoma are significantly different from Wampembe  
530 although this  $F_{ST}$  is an order of magnitude smaller (Fig S3C).

531 For *L. angustifrons*, the PCA based on GBS data did not reveal any genetic structure (Fig  
 532 3D). In entropy,  $K = 1$  appears to be the best fit using DIC and the entropy plot does not  
 533 show any clear clustering for higher values of  $K$  (Fig 4D). In addition, no pairwise  $F_{ST}$   
 534 estimates between sampling sites were significantly different from zero (Fig S3D).

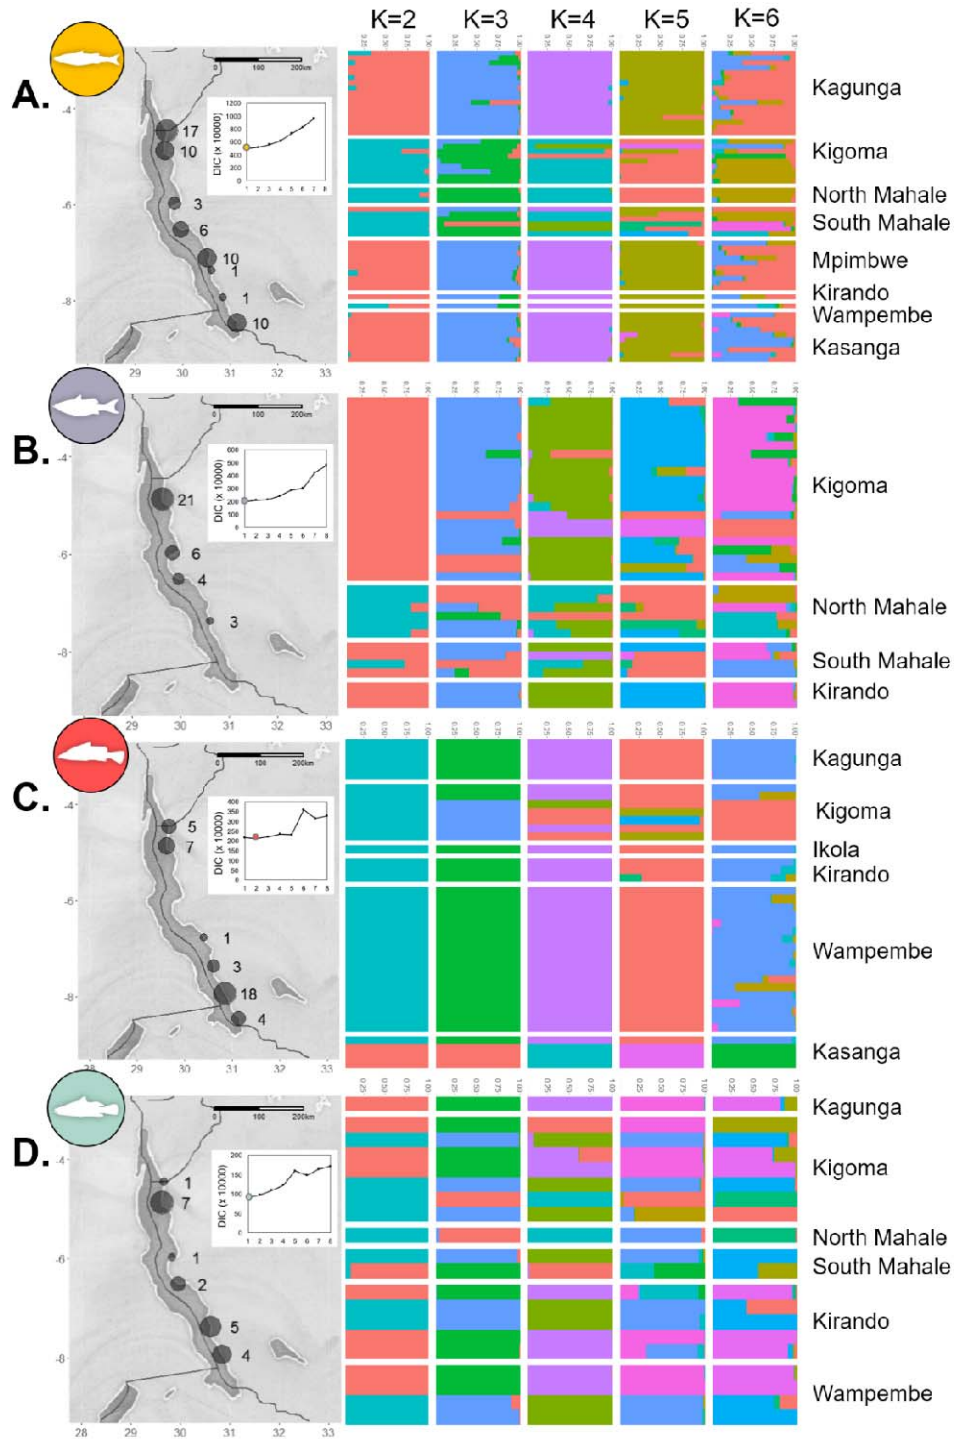

535

536 **Figure 4.** Intraspecific population structure inferred from the GBS data set and entropy analyses at  
 537  $K=2$  to  $K=6$  for (A) *L. stappersii*, (B) *L. microlepis*, (C) *L. mariae*, and (D) *L. angustifrons*. Maps show

538 distribution of individuals and inset plots show discriminant information content (DIC) values for each  
539 value of K, with the lowest DIC for each species indicated with a colored dot.

540

## 541 **Discussion**

542 Differences in life history characteristics can have significant influence on differences in  
543 population genetic structure among taxa, even in closely related species. In this study, we  
544 tested for genetic population structure within the four pelagic top predators of Lake  
545 Tanganyika, using reduced-representation genomic sequencing data sets (GBS and RAD).  
546 We find weak but distinct genetic structure in *L. stappersii* and *L. microlepis*, apparent in  
547 genetic PCA analyses, in pairwise  $F_{ST}$ s between samples of the intraspecific groups, and  
548 with the model-based genetic clustering program entropy (Gompert *et al.* 2014). In *L. mariae*  
549 we find three out of four samples from the most southern sampling site, Kasanga (and to a  
550 lesser extent five out of seven samples from Kigoma) to be genetically distinct from all other  
551 samples. This result was again apparent in genetic PCA analysis, pairwise  $F_{ST}$ s between the  
552 intraspecific groups, and with clustering analysis in entropy. Finally, we found no pattern of  
553 isolation-by-distance in any of the species.

554

### 555 *Genetic patterns in the four Lates species of Lake Tanganyika*

556 We found at least two genetic groups in each of *L. stappersii*, *L. microlepis*, and *L. mariae*.  
557 These clusters are weak in *L. stappersii* and *L. microlepis* and more pronounced in *L.*  
558 *mariae*. Although the samples were all collected along the 450km Tanzanian shoreline of  
559 Lake Tanganyika, none of the genetic differences between populations seems to be related  
560 to geographic distance. Instead, the clusters were associated with individuals from the  
561 central and southern section of the north basin in *L. stappersii* and from the central basin in  
562 *L. microlepis*, and by southern samples and to a lesser degree by samples from the southern  
563 north basin in *L. mariae*. Although these results suggest some genetic differentiation in these  
564 groups, they are not strictly nor ubiquitously tied to particular sampling sites.

565 In *L. mariae*, the majority of samples from the most southern sampling site, Kasanga, are  
566 distinct from all other samples. The magnitude of  $F_{ST}$  estimates between these distinct  
567 individuals and other *L. mariae* individuals ( $F_{ST} \sim 0.13$ ) in the absence of geographical  
568 isolation could suggest not only intraspecific structure, but potentially even two  
569 distinct species in *L. mariae*. Anecdotally, catches of both *L. mariae* and *L. microlepis* are  
570 also highest in the southern part of the lake, suggesting a high abundance of these two  
571 species. It is noteworthy that the southern part of the lake experiences intense mixing of cold,  
572 nutrient rich waters from the deep with oxygenated water from the surface (Verburg *et al.*

573 2011) and consequently has the highest nutrient concentrations and primary productivity  
574 rates, which in turn fuels zooplankton growth (Plisnier *et al.* 2009; Loiselle *et al.* 2014).  
575 Furthermore, the oxygenated layer in the south extends down to more than 120m, and water  
576 temperatures are reduced (Bergamino *et al.* 2010; Verburg *et al.* 2011). As a result, there is  
577 high environmental variability over the course of the year in the south. Such a variable  
578 environment might lead to local differential selection, and this selection combined with  
579 restricted movement of individuals between this and other populations of *L. mariae* could  
580 lead to the genetic differentiation in most individuals from Kasanga. A variable environment  
581 may also lead to within-site differentiation among individuals caught in Kasanga. While all  
582 individuals sampled from Kasanga were mature and *L. mariae* is thought to be the most  
583 resident species of all four *Lates* species (Coulter 1976), it is not clear how resident these  
584 individuals really are; it is possible that some individuals remain resident while others  
585 migrate, such as is the case in Atlantic cod (Kirubakaran *et al.* 2016; Berg *et al.* 2017).  
586 Future studies should focus on expanding sampling here, including sampling various life  
587 stages of this and other *Lates*. In addition, several *L. mariae* from Kigoma formed a  
588 genetically distinct cluster from other samples caught in the region, suggesting differentiation  
589 in multiple regions of the lake in this species not explained by geography. If there is site  
590 fidelity to regionally differentiated spawning grounds but between-region movement outside  
591 of spawning, this could create such patterns of differentiation. However, we do not have data  
592 on the spawning status of the fish collected in this study, which would be required to  
593 investigate this hypothesis.

594 Despite the differences in life history between pelagic cichlids such as *Diplotaxodon* and  
595 *Bathybatini* and the *Lates* species, the genetic patterns between the benthopelagic cichlids  
596 and the benthopelagic *L. mariae* resemble each other in part. For the four benthopelagic  
597 *Diplotaxodon* species of Lake Malawi with genetically structured populations, Genner *et al.*  
598 (2010) implicated spawning site fidelity in driving the structure. Koblmüller *et al.* (2019)  
599 hypothesize that preying upon benthic cichlids and therefore reduced movements can  
600 explain the genetic structure in the *Bathybatini* of Lake Tanganyika. Similar to the  
601 *Bathybatini*, *L. mariae* hunts benthic cichlids and is described as relatively resident (Coulter  
602 1976). Our results did not recover any evidence for significant isolation-by-distance in *L.*  
603 *mariae*, suggesting that the genetic structure that we observe is not the result of dispersal  
604 limitation. However, females of *L. mariae* aggregate over spawning grounds, similar to  
605 *Diplotaxon*. We obtained all samples from fishermen, and thus a range of ages and  
606 reproductive maturities of fish were included in our study. If samples of *L. mariae* were taken  
607 over spawning grounds, it is possible that results would reveal genetically clearly distinct  
608 populations as would be expected from strong spawning site fidelity and differentiation  
609 between these stocks. However, the location of spawning grounds is unclear for all four

610 *Lates* species; furthermore, it is unclear how the pelagic phase of eggs, larvae and small  
611 juveniles (<2.5cm) of *L. mariae* influences dispersal in the species. Future studies should  
612 take care to sample fish at spawning, and to work to understand the location of spawning  
613 grounds, to further assess whether the intraspecific divergences that we see could be linked  
614 to spawning site differentiation and whether some of this divergence may actually reflect  
615 multiple species within *L. mariae*.

616 Koblmüller *et al.* (2019) found no evidence of genetic population structure in two eupelagic  
617 cichlid species of Lake Tanganyika, whereas we do find distinct genetic groups even in the  
618 entirely pelagic species *L. stappersii*, and the mainly pelagic *L. microlepis*. Given the  
619 differences between mouthbrooding cichlids with large actively swimming offspring and free-  
620 spawning *Lates* with tiny pelagic larvae, this contrast is surprising. Although we do not find  
621 evidence for spatial genetic structure in *L. stappersii*, we note that individuals of this species  
622 caught during the dry season in the south of the lake and samples caught in the north show  
623 distinct carbon stable isotope signals (Junker, unpublished data). These differences in  
624 carbon isotope ratios correlate with different rates of primary productivity in the northern and  
625 the southern basin during the dry season (Loiselle *et al.* 2014), or with differences in prey  
626 composition in different areas of the lake (Plisner *et al.* 2009; Kurki *et al.* 1999). This is  
627 evidence for at least partly resident populations of *L. stappersii*, which must stay in the  
628 northern and southern basin during the dry season for long enough to incorporate the  
629 different isotopic signals of these basins. Such movement patterns may reduce gene flow  
630 between *L. stappersii* populations from the basins. However, the distinct genetic groups in *L.*  
631 *stappersii* are not associated with the basins: the same genetic group is widespread in the  
632 south and the north of the lake but is rare in the middle section. This is very similar to the  
633 patterns which we also find in *L. microlepis* and *L. mariae*. Although the geographically  
634 widespread groups agree with observations of long-distance movements in *L. stappersii* and  
635 *L. microlepis*, it conflicts with the evidence of a rather resident lifestyle in *L. mariae*  
636 (Chapman 1976; Coulter 1976, 1991; Muller *et al.* 2001).

637 We find groups with restricted gene flow in three of the four *Lates* species. One potential  
638 explanation for this consistent structure could lie in the long history of Lake Tanganyika. With  
639 an estimated age of 9 -12 million years, Lake Tanganyika is one of the oldest lakes in the  
640 world and has been influenced by extensive lake level fluctuations during its history (Cohen  
641 *et al.* 1993). Based on the bathymetry of the lake, it is thought that Lake Tanganyika was  
642 divided into three paleo-lakes during periods of extremely low water levels (Cohen *et al.*  
643 1997). Environmental fluctuations such as these may have led to oscillations between  
644 sympatry or parapatry and allopatry for fish populations within the lake. Such fluctuations  
645 could lead to persistent genetic structure within species, for example if spawning site fidelity  
646 within separate basins is maintained after the basins reconnect. Such processes may also

647 have ties to the origin of these species through allopatric speciation, a phenomenon referred  
648 to as a “species pump” (Greenwood 1981; Sedano *et al.* 2010). In Lake Tanganyika, these  
649 water level fluctuations have been implicated in speciation in several different cichlid genera  
650 (Janzen & Etienne 2017; Sturmbauer *et al.* 2016). However, in contrast to the *Lates*, all of  
651 these cichlid genera are strictly littoral and highly philopatric. In addition, it has recently been  
652 suggested that the origin of the Lake Tanganyika *Lates* radiation is much younger than other  
653 endemic fish radiations in the lake (Koblmüller *et al.* 2021). Moreover, it remains unclear  
654 whether the timing of these events could explain the current weak differences in the *L.*  
655 *stappersii* and *L. microlepis*. For this mechanism to maintain intraspecific genetic structure,  
656 the genetic groups would have remained reproductively isolated even after the re-  
657 establishment of sympatry with rising lake levels.

658 In *L. angustifrons*, we found no genetic structure, no systematic differentiation in PCA space,  
659 and no evidence for genetic differentiation in pairwise  $F_{ST}$  estimates. This makes the  
660 possibility of localized populations or site fidelity to aggregated spawning grounds of mature  
661 individuals for this species unlikely, despite its benthic habitat affiliations. However, because  
662 of the challenge in collecting samples of this largest and rarest *Lates* species, our sample  
663 sizes of *L. angustifrons* are smaller than in our datasets for the three other species, and we  
664 lack samples from the southernmost sites. Additionally, since all the *Lates* species have a  
665 pelagic larval phase before settling into the inshore nursery habitat, it is possible that larval  
666 dispersal in this species prevents the emergence of any geographic structuring despite  
667 limited movement of adult fish.

668

#### 669 *Recommendations for conservation and sustainable management of Lake Tanganika’s Lates*

670 We find evidence for weak yet genetically distinct groups within *L. stappersii* and *L.*  
671 *microlepis*. We furthermore find evidence for genetically distinct groups within *L. mariae*, in  
672 agreement with previous studies suggesting that this species is the most resident of all four  
673 *Lates* species (Coulter 1976, 1991). Intriguingly, this structure is not linked to isolation-by-  
674 distance, and instead seems to involve strong differentiation between some individuals at  
675 multiple sites, suggesting the existence of a mechanism for maintaining differentiation in  
676 sympatry, such as spawning site fidelity, differences in spawning time, or behavioral  
677 assortative mating. In contrast, the low  $F_{ST}$  estimates between samples belonging to the  
678 same genetic cluster from distant sites suggest that these species do disperse over large  
679 distances.

680 To maintain intraspecific genetic variation, viable population sizes, and possible adaptive  
681 differences between genetic groups within the *Lates* species, management strategies should

682 seek to restrict catches, especially in the spawning areas. These practices have been  
683 implemented in regions around Lake Tanganyika where community conservation areas are  
684 active (Kimirei & Sweke 2018), but are not in place throughout the lake. Such management  
685 practices are performed successfully in the cod fishery of Denmark (albeit after collapse of  
686 this fishery and extinction of many of the original stocks; Dahle *et al.* 2018), and in the  
687 salmon fishery of Bristol Bay (Schindler *et al.* 2015; Schindler *et al.* 2010). However,  
688 implementation of such a strategy requires updated scientific evidence on the spawning  
689 grounds and seasons, and the ability for fishermen to distinguish between the genetically  
690 distinct stocks. Therefore, studies are needed to shed more light on distinct genetic groups  
691 within each species, both phenotypically and ecologically, and to assess the spawning  
692 grounds for the four species. In addition, studies are needed to examine whether fish from  
693 different spawning grounds form the distinct genetic clusters that we identified in this study.  
694 Furthermore, a sustainable management approach is crucial to protect the inshore nursery  
695 habitats and ensure recruitment of the species in Lake Tanganyika.

696

## 697 **Funding**

698 This work was supported by the Swiss National Science Foundation (grant CR23I2-166589  
699 to OS), the University of Wyoming (start-up funding to CEW), the National Science  
700 Foundation (grant DEB-1556963 to CEW), the National Institute of General Medical Sciences  
701 of the National Institutes of Health (Institutional Development Award grant P20GM103432),  
702 and the American Genetics Association (Ecological, Evolutionary, and Conservation  
703 Genomics Research Award to JAR).

704

## 705 **Acknowledgements**

706 Computing was accomplished with an allocation from the University of Wyoming's Advanced  
707 Research Computing Center, on its Teton Intel x86\_64 cluster  
708 (<https://doi.org/10.15786/M2FY47>) and the Genetic Diversity Center (GDC) of ETH Zürich.  
709 Special thanks go to Mupape Mukuli for facilitating logistics during fieldwork and to the crew  
710 of the MV Maman Benita for fieldwork assistance. We thank the whole team at the  
711 Tanzanian Fisheries Research Institute for their support. A special thanks goes to Mary  
712 Kishe for her support during fieldwork permission processes and to the Tanzanian  
713 Commission for Science and Technology (COSTECH) for the permits to do this research.  
714 Live fish samples were collected under the approved University of Wyoming IACUC protocol  
715 #20160602CW00241-01. We appreciate The Nature Conservancy's Tuungane Project for  
716 providing funding and logistical support, with special thanks going to Colin Apse and Peter

717 Limbu. Thanks to the Wagner lab at the University of Wyoming and to the FishEc group at  
718 EAWAG for discussions about the analyses and manuscript. Thanks to C. Alex Buerkle for  
719 discussion of entropy and clustering results.

720

721

722 **Data Availability**

723 We have deposited the primary data underlying these analyses as follows:

- 724 - Sampling locations, morphological data, filtered VCF files: Dryad XXXXX
- 725 - Fastq files for each individual: NCBI SRA XXXXX
- 726 - Scripts for data analysis: Github (<https://github.com/jessicarick/lates-popgen>)

727



728 **References**

- 729 Alexander DH, Novembre J, Lange K (2009) Fast model-based estimation of ancestry in  
730 unrelated individuals. *Genome Research* **19**, 1655-1664.
- 731 Baird NA, Etter PD, Atwood TS, *et al.* (2008) Rapid SNP discovery and genetic mapping  
732 using sequenced RAD markers. *PLoS One* **3**.
- 733 Belgrano A, Fowler CW (2011) *Ecosystem-based management for Marine Fisheries: An*  
734 *evolving perspective* Cambridge University Press, Cambridge.
- 735 Berg PR, Star B, Pampoulie C, *et al.* (2017) Trans-oceanic genomic divergence of Atlantic  
736 cod ecotypes is associated with large inversions. *Heredity* **119**, 418-428.
- 737 Bergamino N, Horion S, Stenuite S, *et al.* (2010) Spatio-temporal dynamics of phytoplankton  
738 and primary production in Lake Tanganyika using a MODIS based bio-optical time  
739 series. *Remote Sensing of Environment* **114**, 772-780.
- 740 Botsford LW, Castilla JC, Peterson CH (1997) The Management of Fisheries and Marine  
741 Ecosystems. *Science* **277**, 509-515.
- 742 Brannon EL, Powell MS, Quinn TP, Talbot A (2004) Population Structure of Columbia River  
743 Basin Chinook Salmon and Steelhead Trout. *Reviews in Fisheries Science* **12**, 99-  
744 232.
- 745 Catchen J, Hohenlohe PA, Bassham S, Amores A, Cresko WA (2013) Stacks: an analysis  
746 tool set for population genomics. *Mol Ecol* **22**, 3124-3140.
- 747 Chapman DW (1976) Acoustic Estimates of Pelagic Ichthyomass in Lake Tanganyika with an  
748 Inexpensive Echo Sounder. *Transactions of the American Fisheries Society* **105**, 581-  
749 587.
- 750 Cohen AS, Gergurich EL, Kraemer BM, *et al.* (2016) Climate warming reduces fish  
751 production and benthic habitat in Lake Tanganyika, one of the most biodiverse  
752 freshwater ecosystems. *Proc Natl Acad Sci U S A* **113**, 9563-9568.
- 753 Cohen AS, Lezzar K-E, Tiercelin J-J, Soreghan M (1997) New palaeogeographic and lake-  
754 level reconstructions of Lake Tanganyika: implications for tectonic, climatic and  
755 biological evolution in a rift lake. *Basin Research* **9**, 107-132.
- 756 Cohen AS, Soreghan MJ, Scholz CA (1993) Estimating the age of formation of lakes: an  
757 example from Lake Tanganyika, East African Rift system. *Geology* **21**, 511-514.
- 758 Coulter GW (1976) The biology of Lates species (Nile perch) in Lake Tanganyika, and the  
759 status of the pelagic fishery for Lates species and *Luciolates stappersii* (Blgr.).  
760 *Journal of Fish Biology* **9**, 235-259.
- 761 Coulter GW (1991) *Lake Tanganyika and its Life* British Museum (Natural History) Cromwell  
762 Road, London SW7 5BD & Oxford University Press, Walton Street, Oxford OX2 6DP.
- 763 Dahle G, Johansen T, Westgaard J-I, Aglen A, Glover KA (2018) Genetic management of  
764 mixed-stock fisheries “real-time”: The case of the largest remaining cod fishery  
765 operating in the Atlantic in 2007–2017. *Fisheries Research* **205**, 77-85.
- 766 Danecek P, Auton A, Abecasis G, *et al.* (2011) The variant call format and VCFtools.  
767 *Bioinformatics* **27**, 2156-2158.
- 768 Dray S, Dufour A-B (2007) The ade4 Package: Implementing the Duality Diagram for  
769 Ecologists. *2007* **22**, 20.
- 770 Eccles DH (1992) Field guide to the freshwater fishes of Tanzania. In: *species identification*  
771 *sheets for fishery purposes* (ed. FAO), p. 145. FAO, Rome.
- 772 Ellegren H, Galtier N (2016) Determinants of genetic diversity. *Nature Reviews Genetics* **17**,  
773 422-433.
- 774 Ellis CMA (1978) Biology of *Luciolates-Stappersii* in Lake Tanganyika (Burundi). *Transactions*  
775 *of the American Fisheries Society* **107**, 557-566.
- 776 Evanno G, Regnaut S, Goudet J (2005) Detecting the number of clusters of individuals using  
777 the software STRUCTURE: a simulation study. *Mol Ecol* **14**, 2611-2620.
- 778 Genner MJ, Nichols P, Shaw PW, *et al.* (2010) Population structure on breeding grounds of  
779 Lake Malawi's 'twilight zone' cichlid fishes. *Journal of Biogeography* **37**, 258-269.
- 780 Gompert Z, Lucas LK, Buerkle CA, *et al.* (2014) Admixture and the organization of genetic  
781 diversity in a butterfly species complex revealed through common and rare genetic  
782 variants. *Mol Ecol* **23**, 4555-4573.

- 783 Greenwood, PH (1981) Species-flocks and explosive evolution. *Chance, change and*  
784 *challenge- the evolving biosphere*, 61-74.
- 785 Gruber B, Unmack PJ, Berry OF, Georges A (2018) dartr: An r package to facilitate analysis  
786 of SNP data generated from reduced representation genome sequencing. *Molecular*  
787 *Ecology Resources* **18**, 691-699.
- 788 Hutchinson WF (2008) The dangers of ignoring stock complexity in fishery management: the  
789 case of the North Sea cod. *Biol Lett* **4**, 693-695.
- 790 Janzen T, Etienne RS (2017) Inferring the role of habitat dynamics in driving diversification:  
791 evidence for a species pump in Lake Tanganyika cichlids.
- 792 Junker J, Rick JA, McIntyre PB, *et al.* (2020) Structural genomic variation leads to genetic  
793 differentiation in Lake Tanganyika's sardines. *Mol Ecol* **29**, 3277-3298.
- 794 Kimirei IA, Mgaya YD, Chande AI (2008) Changes in species composition and abundance of  
795 commercially important pelagic fish species in Kigoma area, Lake Tanganyika,  
796 Tanzania. *Aquatic Ecosystem Health and Management* **11**, 29-35.
- 797 Kimirei IA, Sweke EA (2018) Community-based conservation areas as a fisheries  
798 management tool in the East African Great Lakes: an example from Tanzania. In: 34<sup>th</sup>  
799 SIL Congress, 19-24 August 2018. Nanjing, China. pp. 230 Book of abstracts.
- 800 Kirubakaran TG, Grove H, Kent MP, *et al.* (2016) Two adjacent inversions maintain genomic  
801 differentiation between migratory and stationary ecotypes of Atlantic cod. *Mol Ecol*  
802 **25**, 2130-2143.
- 803 Koblmüller S, Zangl L, Börger C, *et al.* (2019) Only true pelagics mix: comparative  
804 phylogeography of deepwater bathybatine cichlids from Lake Tanganyika.  
805 *Hydrobiologia* **832**, 93-103.
- 806 Koblmüller S, Schögl CA, Lorber CJ, *et al.* (2021) African lates perches (Teleostei, Latidae,  
807 *Lates*): Paraphyly of Nile perch and recent colonization of Lake Tanganyika.  
808 *Molecular Phylogenetics and Evolution* **160**: 107141.
- 809 Kopelman NM, Mayzel J, Jakobsson M, Rosenberg NA, Mayrose I (2015) Clumpak: a  
810 program for identifying clustering modes and packaging population structure  
811 inferences across K. *Mol Ecol Resour* **15**, 1179-1191.
- 812 Korneliussen TS, Albrechtsen A, Nielsen R (2014) ANGSD: Analysis of Next Generation  
813 Sequencing Data. *BMC Bioinformatics* **15**, 356.
- 814 Korneliussen TS, Moltke I, Albrechtsen A, Nielsen R (2013) Calculation of Tajima's D and  
815 other neutrality test statistics from low depth next-generation sequencing data. *BMC*  
816 *Bioinformatics* **14**, 289.
- 817 Kurki H, Mannini P, Vuorinen I, *et al.* (1999) Macrozooplankton communities in Lake  
818 Tanganyika indicate food chain differences between the northern part and the main  
819 basins. *Hydrobiologia* **407**, 123-129.
- 820 Langmead B, Salzberg SL (2012) Fast gapped-read alignment with Bowtie 2. *Nat Methods* **9**,  
821 357-359.
- 822 Lewis PO (2001) A Likelihood Approach to Estimating Phylogeny from Discrete  
823 Morphological Character Data. *Systematic Biology* **50**, 913-925.
- 824 Li H, Durbin R (2009) Fast and accurate short read alignment with Burrows-Wheeler  
825 transform. *Bioinformatics (Oxford, England)* **25**, 1754-1760.
- 826 Li H, Handsaker B, Wysoker A, *et al.* (2009) The Sequence Alignment/Map format and  
827 SAMtools. *Bioinformatics* **25**, 2078-2079.
- 828 Loiselle S, Cózar A, Adgo E, *et al.* (2014) Decadal Trends and Common Dynamics of the  
829 Bio-Optical and Thermal Characteristics of the African Great Lakes. *PLoS One* **9**,  
830 e93656.
- 831 LTA Secretariat (2011) Report on Regional Lakewide Fisheries Frame Survey on Lake  
832 Tanganyika 2011. LTA/TECH DOC/2012/01. Bujumbura, Burundi.
- 833 Mace GM, Purvis A (2008) Evolutionary biology and practical conservation: bridging a  
834 widening gap. *Mol Ecol* **17**, 9-19.
- 835 Malinsky M, Svoldal H, Tyers AM, *et al.* (2018) Whole-genome sequences of Malawi cichlids  
836 reveal multiple radiations interconnected by gene flow. *Nature Ecology & Evolution* **2**,  
837 1940-1955.

- 838 Manier MK, Arnold SJ (2006) Ecological correlates of population genetic structure: a  
839 comparative approach using a vertebrate metacommunity. *Proceedings of the Royal*  
840 *Society B: Biological Sciences* **273**, 3001-3009.
- 841 Mannini P (1998a) *Ecology of the Pelagic Fish Resources of Lake Tanganyika*, University of  
842 Hull.
- 843 Mannini P (1998b) Geographical distribution patterns of pelagic fish and macrozooplankton  
844 in Lake Tanganyika. FAO/FINNIDA Research for the Management of the Fisheries on  
845 Lake Tanganyika. . In: *GCP/RAF/271/FIN-TD/83 (En)*, p. 103 p.
- 846 Mannini P, Aro E, Katonda I, *et al.* (1996) Pelagic fish stocks of Lake Tanganyika: biology  
847 and exploitation. FAO/FINNIDA Research for the Management of the Fisheries of  
848 Lake Tanganyika. In: *GCP/RAF/271/FIN—TD/53 (En)*, p. 60p.
- 849 Mannini P, Katonda I, Kissaka B, Verburg P (1999) Feeding ecology of *Lates stappersii* in  
850 Lake Tanganyika. *Hydrobiologia* **407**, 131-139.
- 851 Martinez Barrio A, Lamichhaney S, Fan G, *et al.* (2016) The genetic basis for ecological  
852 adaptation of the Atlantic herring revealed by genome sequencing. *Elife* **5**.
- 853 Meisner J, Liu S, Huang M, Albrechtsen A (2021) Large-scale inference of population  
854 structure in presence of missingness using PCA. *Bioinformatics*, btab027.
- 855 Mölsä H, Reynolds JE, Coenen EJ, Lindqvist OV (1999) Fisheries research towards resource  
856 management on Lake Tanganyika. *Hydrobiologia* **407**, 1-24.
- 857 Mölsä H, Sarvala J, Badende S, *et al.* (2002) Ecosystem monitoring in the development of  
858 sustainable fisheries in Lake Tanganyika. *Aquatic Ecosystem Health and*  
859 *Management* **5**, 267-281.
- 860 Muller P, Li XP, Niyogi KK (2001) Non-photochemical quenching. A response to excess light  
861 energy. *Plant Physiol* **125**, 1558-1566.
- 862 Munyandero J (2002) The lake Tanganyika clupeid and latid fishery system: Indicators and  
863 problems inherent in assessments and management. *African Study Monographs* **23**,  
864 117-145.
- 865 Ntakimazi G (2006a) *Lates angustifrons*. The IUCN Red List of Threatened Species 2006:  
866 e.T60833A12416551.  
867 <http://dx.doi.org/10.2305/IUCN.UK.2006.RLTS.T60833A12416551.en> . Downloaded  
868 on 30 September 2015.
- 869 Ntakimazi G (2006b) *Lates mariae*. The IUCN Red List of Threatened Species 2006:  
870 e.T60836A12416789.  
871 <http://dx.doi.org/10.2305/IUCN.UK.2006.RLTS.T60836A12416789.en> . Downloaded  
872 on 30 September 2015.
- 873 Ntakimazi G (2006c) *Lates microlepis*. The IUCN Red List of Threatened Species 2006:  
874 e.T60837A12416878.  
875 <http://dx.doi.org/10.2305/IUCN.UK.2006.RLTS.T60837A12416878.en> . Downloaded  
876 on 30 September 2015.
- 877 O'Reilly CM, Alin SR, Piisnier PD, Cohen AS, McKee BA (2003) Climate change decreases  
878 aquatic ecosystem productivity of Lake Tanganyika, Africa. *Nature* **424**, 766-768.
- 879 Olsen JB, Crane PA, Flannery BG, *et al.* (2011) Comparative landscape genetic analysis of  
880 three Pacific salmon species from subarctic North America. *Conservation Genetics*  
881 **12**, 223-241.
- 882 Paffen P, Coenen E, Bambara S, *et al.* (1997) Synthesis of the 1995 simultaneous frame  
883 survey of Lake Tanganyika Fisheries. FAO/FINNIDA Research for the Management  
884 of the Fisheries on Lake Tanganyika. In: *GCP/RAF/271/FIN—TD/60 (En)*, p. 22p.
- 885 Parchman TL, Gompert Z, Mudge J, *et al.* (2012) Genome-wide association genetics of an  
886 adaptive trait in lodgepole pine. *Mol Ecol* **21**, 2991-3005.
- 887 Peterman WE, Anderson TL, Ousterhout BH, *et al.* (2015) Differential dispersal shapes  
888 population structure and patterns of genetic differentiation in two sympatric pond  
889 breeding salamanders. *Conservation Genetics* **16**, 59-69.
- 890 Petren K, Grant PR, Grant BR, Keller LF (2005) Comparative landscape genetics and the  
891 adaptive radiation of Darwin's finches: the role of peripheral isolation. *Mol Ecol* **14**,  
892 2943-2957.

- 893 Pettersson ME, Rochus CM, Han F, *et al.* (2019) A chromosome-level assembly of the  
894 Atlantic herring genome-detection of a supergene and other signals of selection.  
895 *Genome Research* **29**, 1919-1928.
- 896 Plisnier PD, Mgana H, Kimirei I, *et al.* (2009) Limnological variability and pelagic fish  
897 abundance (*Stolothrissa tanganicae* and *Lates stappersii*) in Lake Tanganyika.  
898 *Hydrobiologia* **625**, 117-134.
- 899 Reich D, Thangaraj K, Patterson N, Price AL, Singh L (2009) Reconstructing Indian  
900 population history. *Nature* **461**, 489-494.
- 901 Reiss H, Hoarau G, Dickey-Collas M, Wolff WJ (2009) Genetic population structure of marine  
902 fish: mismatch between biological and fisheries management units. *Fish and*  
903 *Fisheries* **10**, 361-395.
- 904 Riginos C, Buckley YM, Blomberg SP, *et al.* (2014) Dispersal Capacity Predicts Both  
905 Population Genetic Structure and Species Richness in Reef Fishes. *The American*  
906 *Naturalist* **184**, 52-64.
- 907 Sarvala J, Tarvainen M, Salonen K, Mölsä H (2002) Pelagic food web as the basis of  
908 fisheries in Lake Tanganyika: A bioenergetic modeling analysis. *Aquatic Ecosystem*  
909 *Health and Management* **5**, 283-292.
- 910 Schindler DE, Armstrong JB, Reed TE (2015) The portfolio concept in ecology and evolution.  
911 *Frontiers in Ecology and the Environment* **13**, 257-263.
- 912 Schindler DE, Hilborn R, Chasco B, *et al.* (2010) Population diversity and the portfolio effect  
913 in an exploited species. *Nature* **465**, 609-612.
- 914 Sedano RE, Burns KJ, Riddle B (2010) Are the Northern Andes a species pump for  
915 Neotropical birds? Phylogenetics and biogeography of a clade of Neotropical  
916 tanagers (Aves: Thraupini). *Journal of Biogeography* **37**, 325-343.
- 917 Selkoe KA, Toonen RJ (2011) Marine connectivity: a new look at pelagic larval duration and  
918 genetic metrics of dispersal. *Marine Ecology Progress Series* **436**, 291-305.
- 919 Skotte L, Korneliusen TS, Albrechtsen A (2013) Estimating individual admixture proportions  
920 from next generation sequencing data. *Genetics* **195**, 693-702.
- 921 Snoeks J, Carvalho GR (2004) *The Cichlid Diversity of Lake Malawi/Nyasa/Niassa:*  
922 *Identification, Distribution and Taxonomy* Cichlid Press.
- 923 Stamatakis A (2014) RAxML version 8: a tool for phylogenetic analysis and post-analysis of  
924 large phylogenies. *Bioinformatics* **30**, 1312-1313.
- 925 Stearns SC (1992) *The evolution of life histories* Oxford Univ. Press, New York.
- 926 Stenuite S, Pirlot S, Hardy MA, *et al.* (2007) Phytoplankton production and growth rate in  
927 Lake Tanganyika: evidence of a decline in primary productivity in recent decades.  
928 *Freshwater Biology* **52**, 2226-2239.
- 929 Sterner T (2007) Unobserved diversity, depletion and irreversibility The importance of  
930 subpopulations for management of cod stocks. *Ecological Economics* **61**, 566-574.
- 931 Sturmbauer C, Börger C, Van Steenberge M, Koblmüller S (2016) A separate lowstand lake  
932 at the northern edge of Lake Tanganyika? Evidence from phylogeographic patterns in  
933 the cichlid genus *Tropheus*. *Hydrobiologia* **791**, 51-68.
- 934 Sunday JM, Popovic I, Palen WJ, Foreman MG, Hart MW (2014) Ocean circulation model  
935 predicts high genetic structure observed in a long-lived pelagic developer. *Mol Ecol*  
936 **23**, 5036-5047.
- 937 [dataset] Temasek Life Sciences Laboratory (2016). *Lates calcarifer* isolate:ASB-BC8  
938 Genome sequencing and assembly. National Center for Biotechnology Information  
939 Sequence Read Archive, Assembly GCA\_001640805.1.
- 940 Therkildsen NO, Hemmer-Hansen J, Als TD, *et al.* (2013) Microevolution in time and space:  
941 SNP analysis of historical DNA reveals dynamic signatures of selection in Atlantic  
942 cod. *Mol Ecol* **22**, 2424-2440.
- 943 van der Knaap M (2013) Comparative analysis of fisheries restoration and public  
944 participation in Lake Victoria and Lake Tanganyika. *Aquatic Ecosystem Health and*  
945 *Management* **16**, 279-287.
- 946 Van der Knaap M, Katonda KI, De Graaf GJ (2014) Lake Tanganyika fisheries frame survey  
947 analysis: Assessment of the options for management of the fisheries of Lake  
948 Tanganyika. *Aquatic Ecosystem Health and Management* **17**, 4-13.

- 949 van Zwieten PAM, Roest FC, Machiels MAM, Van Densen WLT (2002) Effects of inter-  
950 annual variability, seasonality and persistence on the perception of long-term trends  
951 in catch rates of the industrial pelagic purse-seine fishery of northern Lake  
952 Tanganyika (Burundi). *Fisheries Research* **54**, 329-348.
- 953 van Zwieten PAM, Kolding J, Plank MJ, *et al.* (2016) The Nile perch invasion in Lake Victoria:  
954 cause or consequence of the haplochromine decline? *Canadian Journal of Fisheries  
955 and Aquatic Sciences* **73**, 622-643.
- 956 Verburg P, Antenucci JP, Hecky RE (2011) Differential cooling drives large-scale convective  
957 circulation in Lake Tanganyika. *Limnology and Oceanography* **56**, 910-926.
- 958 Verburg P, Hecky RE (2009) The physics of the warming of Lake Tanganyika by climate  
959 change. *Limnology and Oceanography* **54**, 2418-2430.
- 960 Verburg P, Hecky RE, Kling H (2003) Ecological consequences of a century of warming in  
961 Lake Tanganyika. *Science* **301**, 505-507.
- 962 Vij S, Kuhl H, Kuznetsova IS, *et al.* (2016) Chromosomal-Level Assembly of the Asian  
963 Seabass Genome Using Long Sequence Reads and Multi-layered Scaffolding. *PLOS  
964 Genetics* **12**, e1005954-e1005954.
- 965 Wenburg JK, Bentzen P, Foote CJ (1998) Microsatellite analysis of genetic population  
966 structure in an endangered salmonid: the coastal cutthroat trout (*Oncorhynchus clarki  
967 clarki*). *Mol Ecol* **7**, 733-749.
- 968 Wilson AB, Teugels GG, Meyer A (2008) Marine incursion: the freshwater herring of Lake  
969 Tanganyika are the product of a marine invasion into west Africa. *PLoS One* **3**,  
970 e1979.
- 971 Young EF, Belchier M, Hauser L, *et al.* (2015) Oceanography and life history predict  
972 contrasting genetic population structure in two Antarctic fish species. *Evolutionary  
973 Applications* **8**, 486-509.
- 974
